# Supplementary material for: Real time plasmonic spectroscopy of the interaction of Hg2+ with single noble metal nanoparticles
Source: Royal Society of Chemistry journal article supplement (doi:10.1039/c2ra21384b), 2012-01-01
Supplement: c2ra21384b.pdf [file c2ra21384b.pdf]

## Electronic supplementary information

# Real time plasmonic spectroscopy of the interaction of $\text{Hg}^{2+}$ with single noble metal nanoparticles

M. S. Bootharaju, K. Chaudhari and T. Pradeep\*

*DST Unit of Nanoscience (DST UNS), Department of Chemistry,*

*Indian Institute of Technology Madras, Chennai - 600 036, India*

\*E-mail: [pradeep@iitm.ac.in](mailto:pradeep@iitm.ac.in)

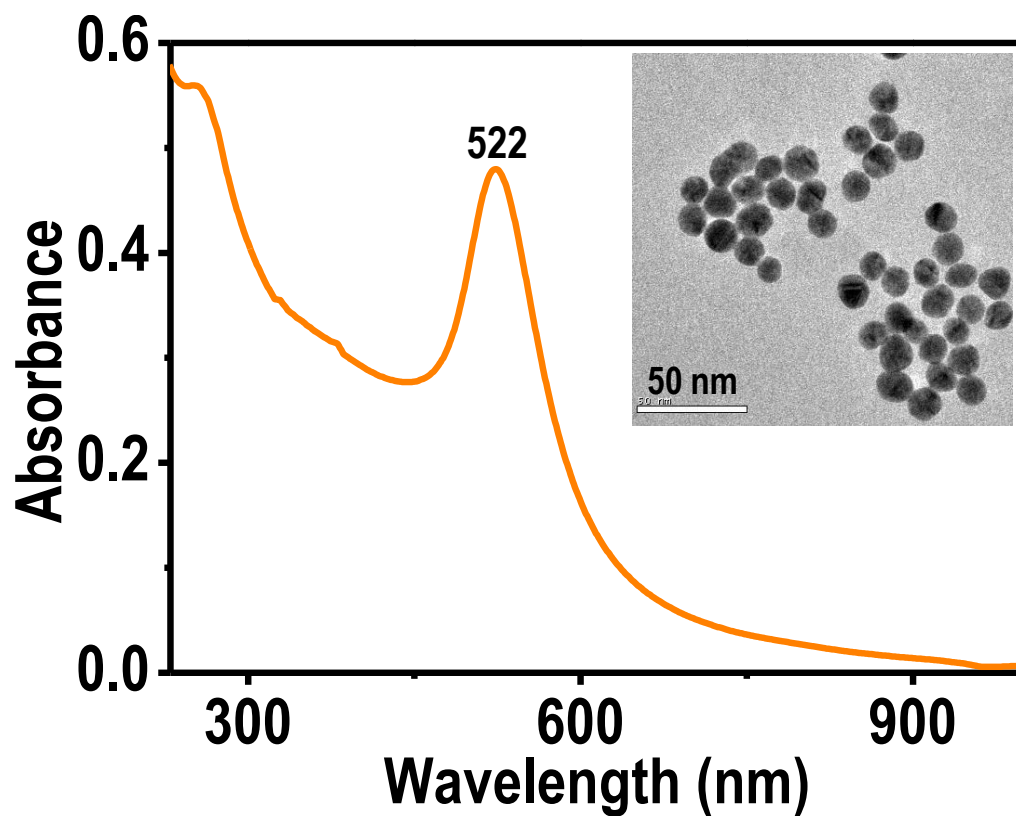

Fig. S1 UV-vis absorption spectrum of as-prepared Au@citrate NPs. Inset is the TEM image of Au@citrate NPs.

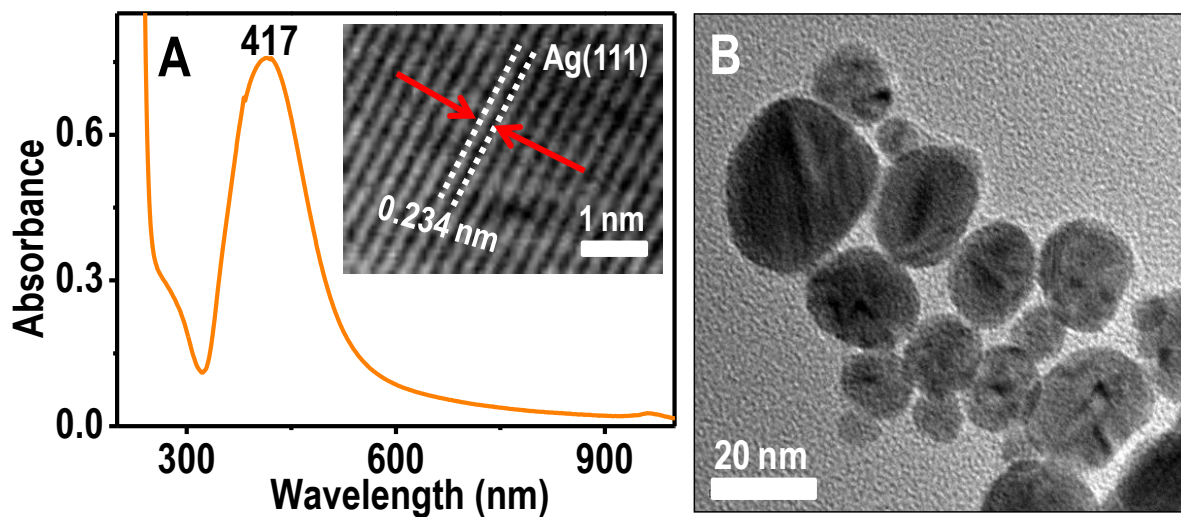

Fig. S2 UV-vis absorption spectrum (A) and TEM image (B) of as-synthesized Ag@citrate NPs. Lattice plane and inter planar distance of Ag(111) in a single NP are shown as inset of A.

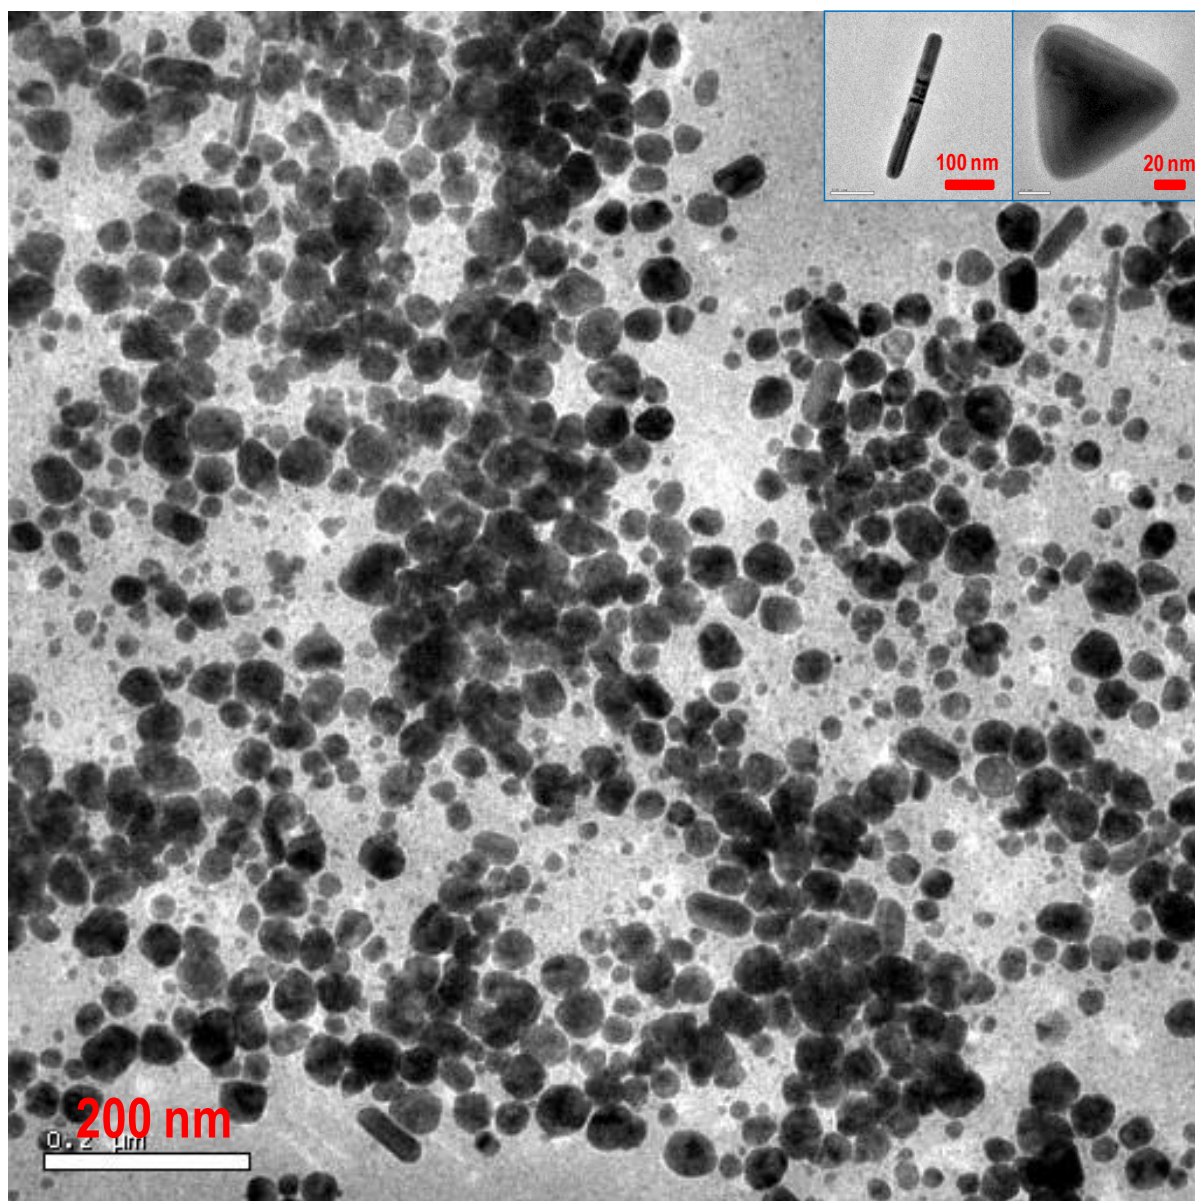

**Fig. S3** Large area TEM image of as-synthesized Ag@citrate particles which shows polydispersity along with different morphologies. A single nanorod and a triangle are shown as insets.

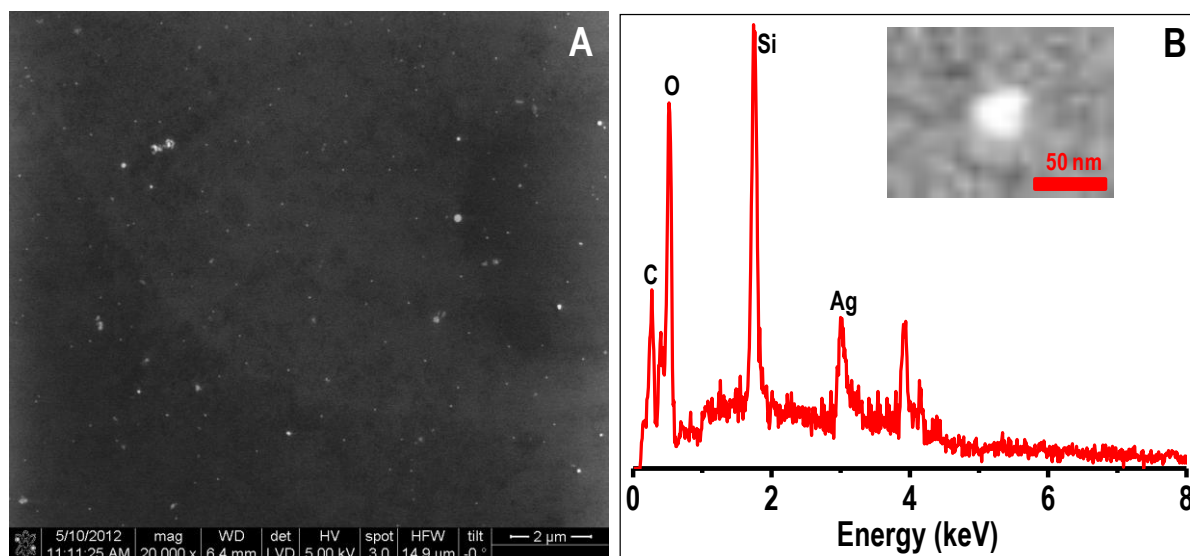

**Fig. S4** A) Large area FESEM image of immobilized Ag@citrate particles on glass substrate. B is the EDAX spectrum of one of the particles (inset of B). Data indicate the presence of silver. Si is from the substrate used. O is also partly from the substrate.

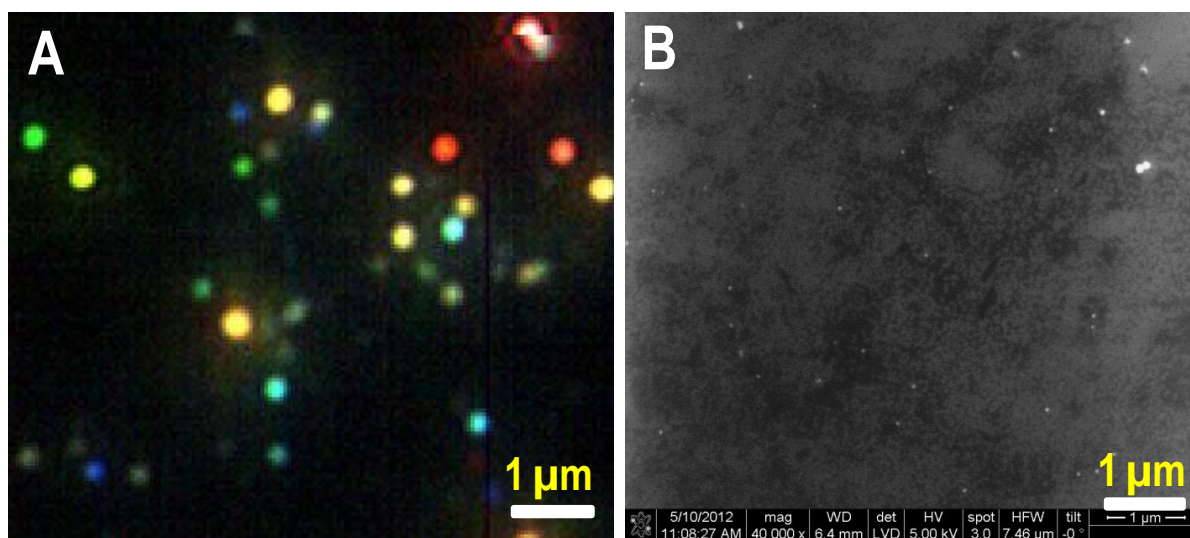

**Fig. S5** Comparison of number of particles in HSI (A) and FESEM (B) images of immobilized (on glass slide) Ag@citrate nanoparticles in a given area ( $7.2 \times 6.2 \mu\text{m}^2$ ). The number of particles in A and B are  $33 \pm 3$  and  $35 \pm 3$ , respectively.

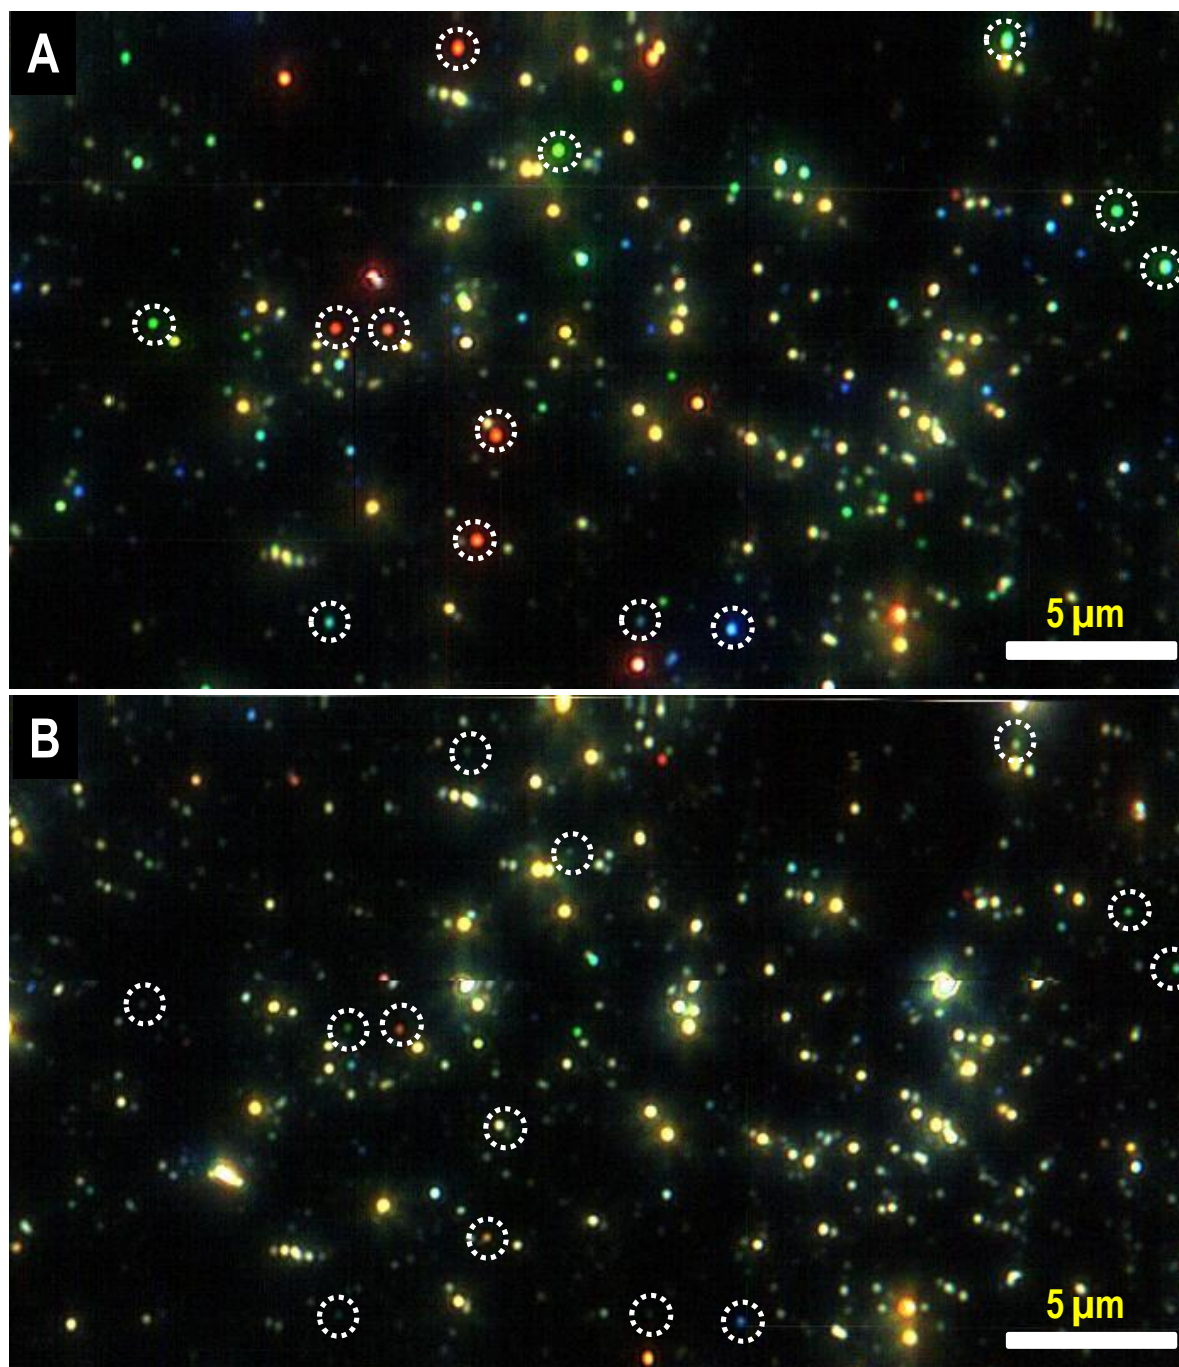

**Fig. S6** Large area HSI of immobilized Ag@citrate NPs before and after treating 5 ppm Hg<sup>2+</sup> for 6.0 h (A and B, respectively). Changes in colors of some of the NPs are marked with dotted circles, for comparison.

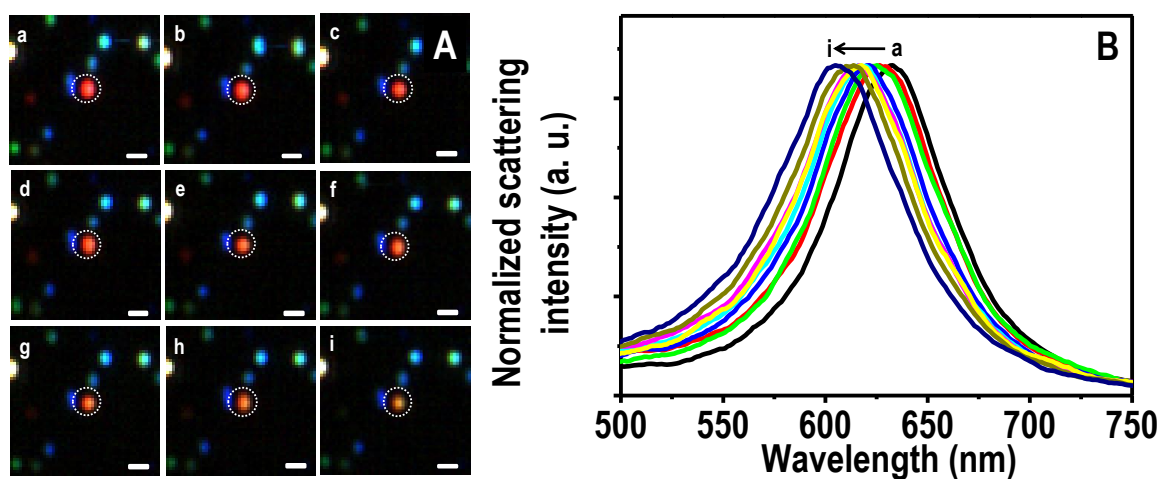

**Fig. S7** HSI (A) of immobilized Ag@citrate NPs after passing 5 ppm  $\text{Hg}^{2+}$  for 0.0, 0.5, 1.0, 1.5, 2.0, 2.5, 3.0, 4.0 and 6.0 h (a-i, respectively). Scattering spectra (B) of red particle (marked with dots) with time (a-i). Scale bars of images in A are 500 nm.

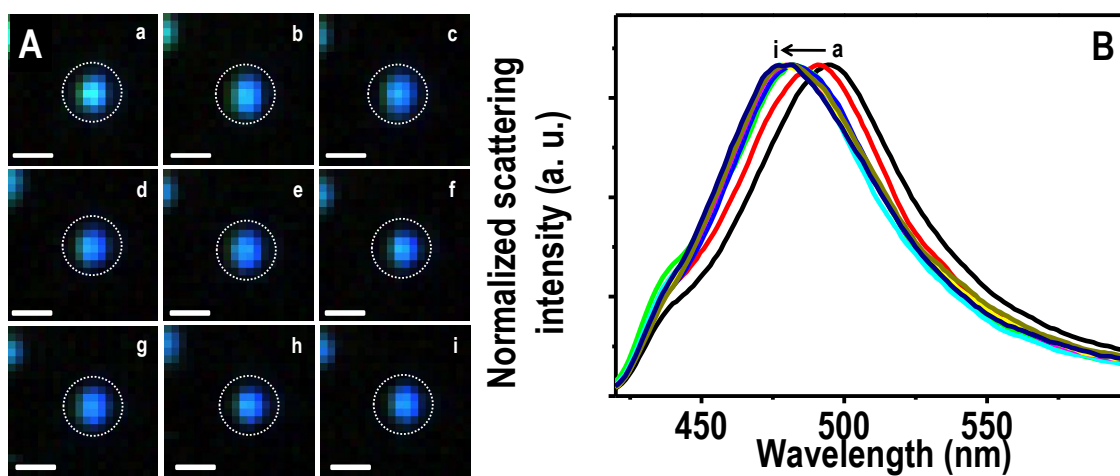

**Fig. S8** HSI (A) of immobilized Ag@citrate NPs after passing 5 ppm  $\text{Hg}^{2+}$  for 0.0, 0.5, 1.0, 1.5, 2.0, 2.5, 3.0, 4.0 and 6.0 h (a-i, respectively). Scattering spectra (B) of blue particle (marked with dots) with time (a-i). Scale bars of images in A are 400 nm.

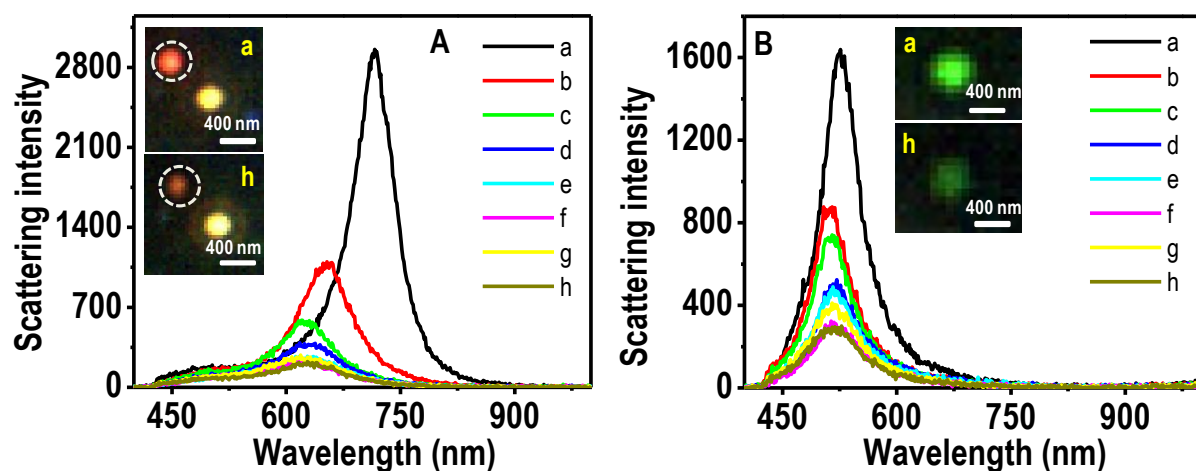

**Fig. S9** Time-dependent scattering spectra of red (A) and green (B) particles. Insets of A and B are the HSI images of red and green particles after the treatment of 5 ppm  $\text{Hg}^{2+}$  for 0.5 and 6.0 h. "a-h" are the times 0.0, 0.5, 1.5, 2.0, 2.5, 3.0, 4.0 and 6.0 h, respectively.

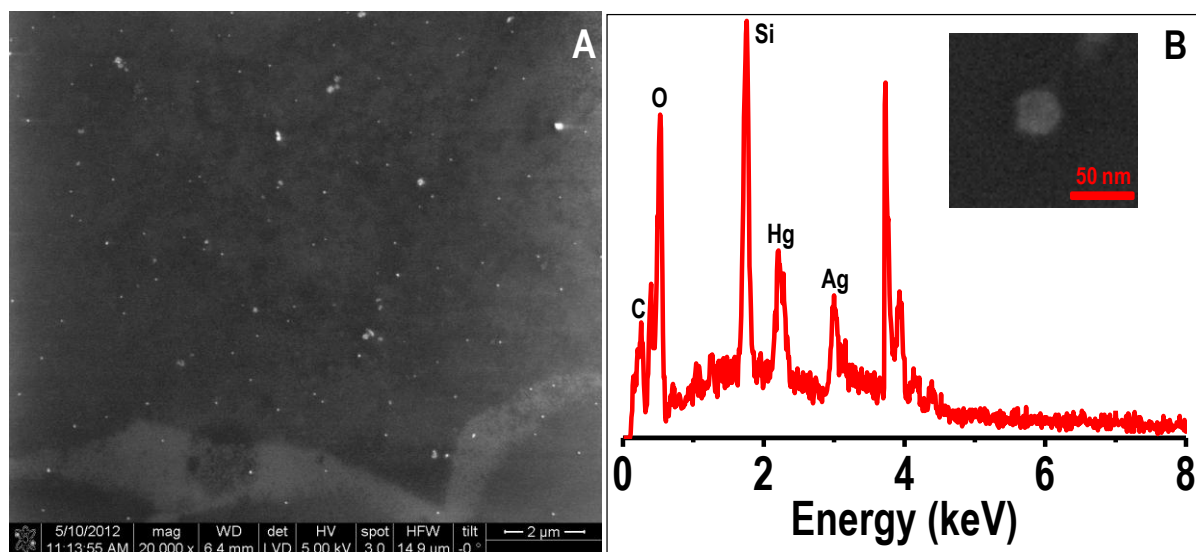

**Fig. S10** A) Large area FESEM image of immobilized Ag@citrate particles after treating 5 ppm  $\text{Hg}^{2+}$  for 3.0 h on glass substrate. B is the EDAX spectrum of one of the particles (inset B) indicating the presence of silver and mercury. Si is from the substrate used. O is also partly from the substrate.

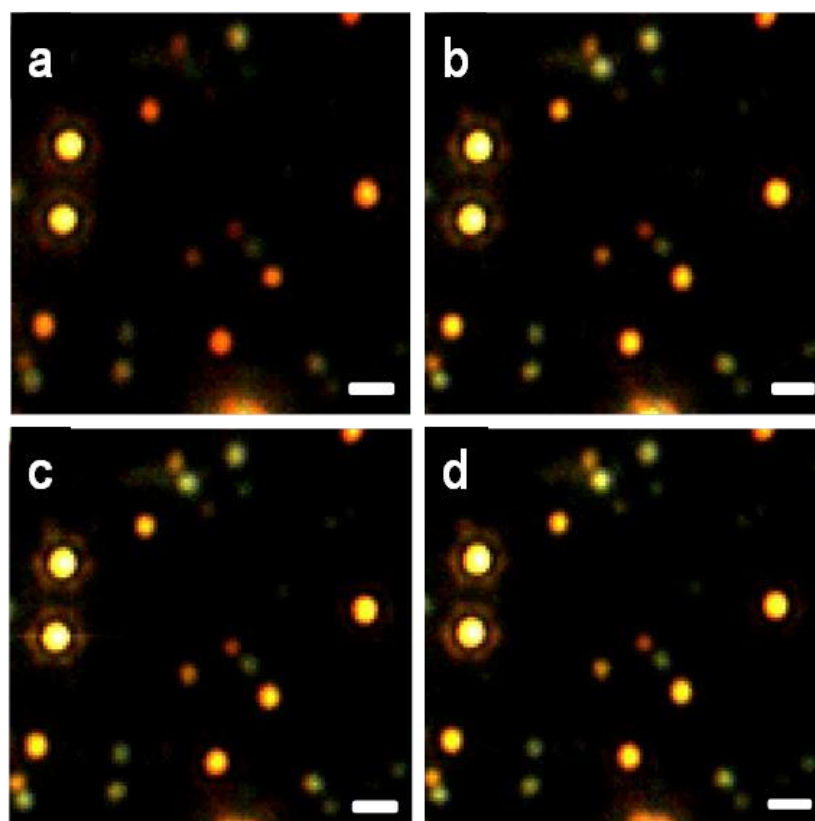

**Fig. S11** HSI images of immobilized Au@citrate NPs after passing 5 ppm  $\text{Hg}^{2+}$  for 0.0, 2.0, 4.0 and 6.0 h (a-d, respectively). Scale bars in the images are 500 nm.

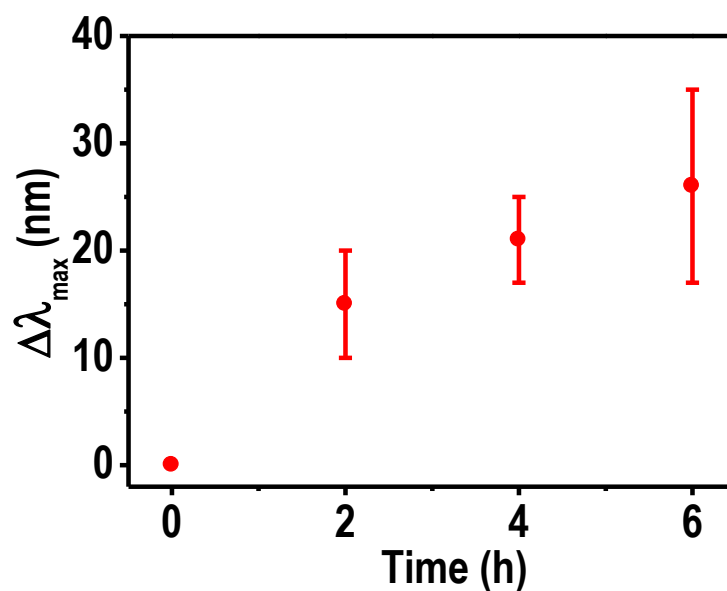

**Fig. S12** A plot of average blue shift ( $\Delta\lambda_{\text{max}}$ ) of 5 red Au@citrate particles treated with  $\text{Hg}^{2+}$  with time.

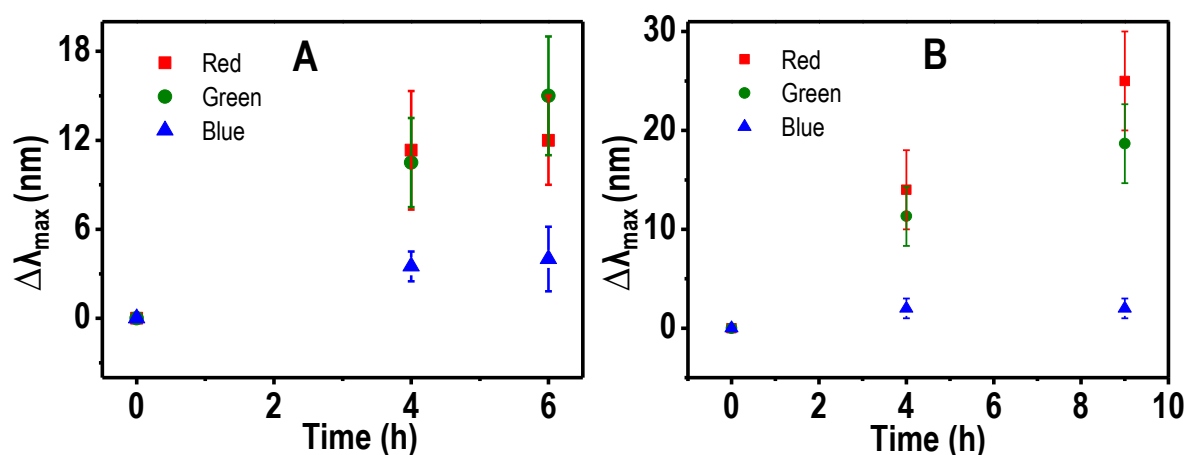

**Fig. S13** Plots of average blue shift ( $\Delta\lambda_{\max}$ ) of 5 particles of each color (red, blue and green) after passing DI and tap waters (A and B, respectively) with time.

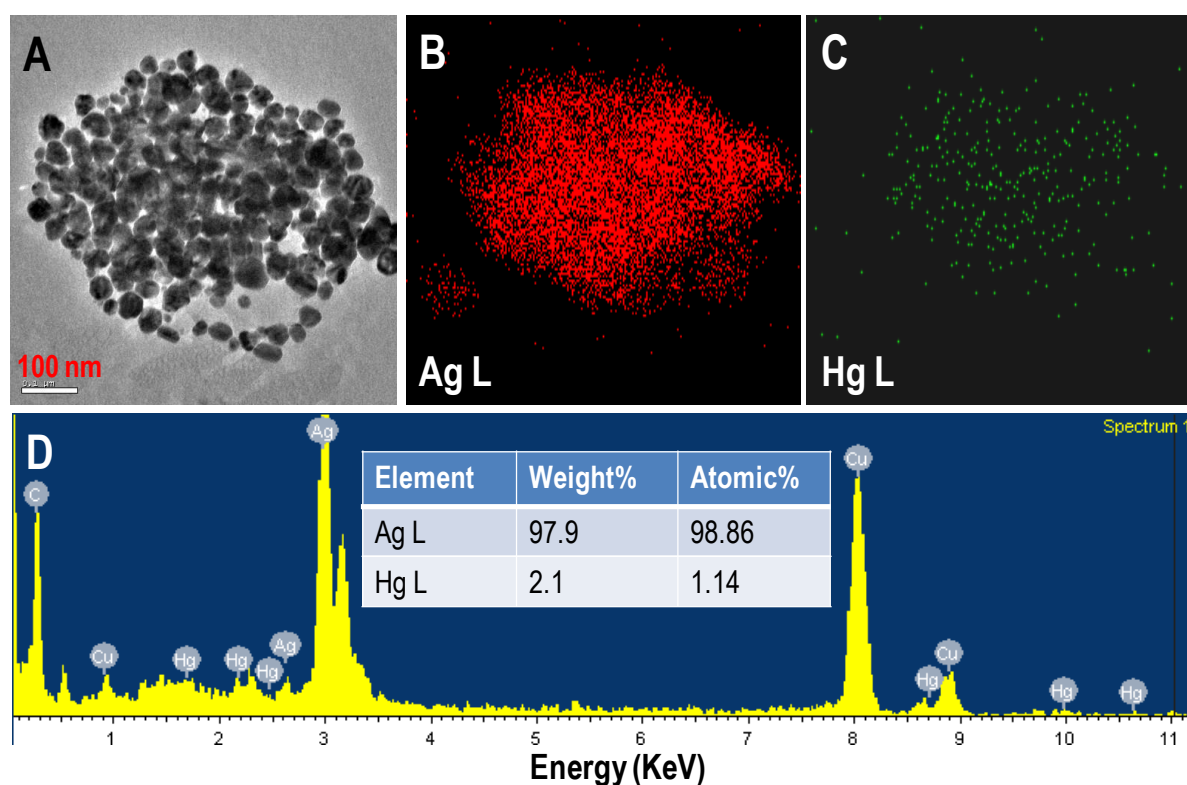

**Fig. S14** TEM image (A) and elemental maps of Ag and Hg (B and C, respectively) of an aggregate of Ag@citrate NPs formed with interaction of 5 ppm  $\text{Hg}^{2+}$  for 6.0 h. D is EDAX spectrum of A in which a table of quantitation of elements is shown as inset. The EDAX image is rotated by  $45^\circ$  in comparison to the TEM image.
